# Supplementary material for: The Andean Paepalanthus pilosus complex (Eriocaulaceae): a revision with three new taxa
Source: PhytoKeys. 2016 Jun 13;(64):1–57. doi: 10.3897/phytokeys.64.6864 (PMC4956916; doi:10.3897/phytokeys.64.6864)
Supplement: Supplementary material 2 — Paepalanthus pilosus complex, specimen database [file phytokeys-064-001-s002.xls]

## Sheet: Sheet1
TAXON	ID qualifier	COUNTRY	PROV	LOCAL	ELEV	HABITAT	HABIT	COLLECTOR 1	COL2	Coll. No. PREFIX	NUMBER	Coll. No. SUFFIX	HERBARIA	verbatim collection date	COLLECTION YEAR	NOTES	TYPES	Latitude - label or Tropicos	Longitude - label or Tropicos	Lat/Long source: label, or Tropicos	Lat/Long estimated by me for mapping
Paepalanthus lodiculoides		PERU	Piura	Huancabamba. Huaringas.	3957 m	Páramo.	Hierba de la Reina.'	Ochoa T.,H.			13		USM (photo)		1984	det from photo					5.06S 79.48W
Paepalanthus pilosus var. pilosus		COLOMBIA	Cundinamarca	Bogota DC, Sumapaz, Vda.Toldo.	3750 m		Hojas ... lanceoladas de color verde oscuro en el haz, enves verde claro.	Rios,S.	et al.		16		UDBC (online)	8-Aug	2003	filed as P. karstenii at UDBC. dense low mat.					4.08N 74.27W
Paepalanthus pilosus var. pilosus		VENEZUELA	Merida	On east moraine above Laguna Mucubají		On somewhat moist, gentle slope, in open páramo	Plants in dense clumps. With Espeletia schultzii. Aciache pulvinata, Acaena cylindrostachya, and Geranium.	Hanselmann,D.P.	L.Loveless		24		MO	11-Jun	1972						8.79N 70.83W
Paepalanthus dendroides		PERU	Cusco	Prov. Paucartambo. Abra de Acjanaco - Tres Cruces de Oro.	3700 m	En bosque de neblina. En suelos humedos junto a gramineas.		Tupayachi,A.			50		F,MO	13 Nov	1986	distributed as P. pilosus		13 07'S	71 40'W	Label	13.12S 71.67W
Paepalanthus dendroides		COLOMBIA	Cundinamarca	Pántanos de Fúquene, pántano seco Laguna Verde.	2600 m	Pantano seco		Perez-Arbelaez,E.			66		COL online	Mar	1930	imaged at COL, filed asP. lamarckii, but Mold had cited as 'pilosus'					5.43N 73.75W
Paepalanthus pilosus var. pilosus		COLOMBIA	Cundinamarca	Laguna de Verjon				Aristé-Joseph,Bro.		A.	73		LL,US [US0088357]	27-Jul	1917		TYPE: Paepalanthus karstenii var. minimus				4.56N 74.02W
Paepalanthus pilosus var. pilosus		COLOMBIA	Cundinamarca	road from Usme to Paramo de Chisaca [laguna de Chisaca is on Complejo Sumapaz map]				Schultes,R.E.	et al.		81		F	25-Jun	1967						4.33N 74.19W
Paepalanthus dendroides		COLOMBIA	Antioquia	En una meseta 1 km N of Santa Rosa de Osos.	2600 m	Subparamo estepário con helechos y pocos arbustos y juncos cerca a los rios, en suelo arcilloso y poco seco, clima frio.	Yerba con tallo erguido de 1.5 [m?]	Barkley, F.A.	S.Posada S., M. Torregrossa	18A	100		NY	25-Sep	1948	First collector sometimes cited as S.Posada, other times as F.A.Barkley, both listed here.	TYPE: Paepalanthus barkleyi				6.65N 75.46W
Paepalanthus dendroides		COLOMBIA	Antioquia	En una meseta 1 km N of Santa Rosa de Osos.	2600 m	Subparamo estepário con helechos y pocos arbustos y juncos cerca a los rios, en suelo arcilloso y poco seco, clima frio.	Yerba con tallo erguido de 1.5 [m?]	Posada,S.	M.Torregrossa,F.A.Barkley	18A	100		NY	25-Sep	1948	First collector sometimes cited as S.Posada, other times as F.A.Barkley, both listed here.	TYPE: Paepalanthus barkleyi				6.65N 75.46W
Paepalanthus caryonauta		COLOMBIA	Nariño	Mpio. de Tangua, Vereda de las Piedras. Páramo las Piedras.	3100-3500 m			Baca,A.	et al.	Y-	118		COL000257193	9-Jun	2006	det as karstenii online					1.1N 77.32W
Paepalanthus pilosus var. pilosus		COLOMBIA	Cundinamarca	Páramo de Guasca, vertiente occidental.	3300-3400 m	Barranco rocoso.	Acaule, crece formando conglomerado en 'cojin'.	Sarmiento,F.			128		COL [COL000223794]	12-Jan	1974	dense mat.					4.84N 73.81W
Paepalanthus pilosus var. pilosus		COLOMBIA	Cundinamarca	Mpio. Usme, Paramo de Sumapaz. Carmen de Carupa.	3680 m			Betancur,J.C.	O.Marulanda		150		MO	26-Jul	1986						4.33N 74.18W
Paepalanthus dendroides		COLOMBIA	Antioquia	En una meseta a 1 km al S de Hoyo Rico. [see Hoyorrico on gmaps]	2600 m	Subparamo de arbustos, arboles, helechos y liquenes, con juncos cerca a los rios y con Sphagnum cerca las vertientes de agua, en suelos arcillo-arenosos, poco humedos, clima frio.		Valderrama,L.E.	F.A.Barkley	18A	164		MICH	26-Sep	1948	filed as P. pilosus at MICH					6.59N 75.43W
Paepalanthus pilosus var. pilosus		COSTA RICA	San José	Canton de Dota. Copey. Cerro Vueltas.	3150 m	Paramo.	Forming cushion. Axillary inflorescence white, seeds black.	Cascante,A.	et al.		212		F,MO	28-Mar	1994			9 37'40"N	83 51'10"W	Tropicos	9.62N 83.85W
Paepalanthus pilosus var. pilosus		COSTA RICA	Cartago	Asuncion (summit of Cerro de la Muerte), 83 km from San Jose on Pan-Am Hwy.	3335 m	Open wind swept paramo. Dominants: Ericaceous shrubs, Chusquea.. Hypericum, Pernettya, Vaccinum; Herbs: Poa, Brachypodium.. Agrostis.. Trisetum... 'Eriocaulon microcephalum'...		Mori,S.	R. Anderson		220		F	22-Jul	1966						9.57N 83.75W
Paepalanthus pilosus var. pilosus		ECUADOR	Loja	Yangana-Valladolid, sendero en cresta al oeste del apso.	2800-2900 m	Zona lluviosa in paramo.		Larsen,B.B.	B.Dall		237		MO	5 Sep	1985						4.45S 79.16W
Paepalanthus pilosus var. pilosus		COSTA RICA	Cartago/San José	Cerro de la Muerte.		Open areas, paramo.	Herb. Fl greenish-white. Patchy.	Heithaus,R.			245		F,MO	22-Jul	1971						9.55N 83.75W
Paepalanthus dendroides		COLOMBIA	Antioquia	Yarumal. Corregimiento Llanos de Cuivá. Carretera a San Jose de Montaña.	2700 m			Roldán,F.J.			252		MO	27-Jul	1986			06 50'N	75 30'W	Label	6.83N 75.5W
Paepalanthus huancabambensis		PERU	Piura	Prov. Huancabamba: Huancabamba-Sapalache, waterfall E of Chorro Blanca east of Sapalache.	2650-2930 m	Cloud forest remnants and burnt fields. Growing under Pteridium aquilinum in former cloud forest (now burnt).	Mat forming herb.	Weigend,M.	N. Dostert	98/	252		M	19 May	1998						5.14S 79.39W
Paepalanthus lodiculoides		PERU	Piura	Huancabamba. Talanco.	3400 m	[Illeg.] d'eau	Nombre vulg. Yerba del ..?	Friedberg,C.			256		USM (photo)	12 Jun	1961	det from photo					5.08S 79.54W
Paepalanthus caryonauta X P. pilosus		COLOMBIA	Antioquia	Paramo Frontino, near Llano Grande.	3450 m	Espeletia paramo, Sphagnum bog.	Plants easy to separate. [mostly P. pilosus]	Boeke,J.D.	J.B.McElroy		265		NY p.p.	27-Oct	1976	NY p.p., as to 2nd plant from left at top of sheet, mixed with P. pilosus					6.47N 76.08W
Paepalanthus pilosus var. pilosus		COLOMBIA	Antioquia	Paramo Frontino, near Llano Grande.	3450 m	Espeletia paramo, Sphagnum bog.	Plants easy to separate.	Boeke,J.D.	J.B.McElroy		265		NY p.p.	27-Oct	1976	NY p.p., mixed with P. caryonauta hybrid					6.47N 76.08W
Paepalanthus caryonauta X P. pilosus		COLOMBIA	Antioquia	Paramo de Frontino, near Llano Grande.	3450 m	Espeletia paramo, well-drained hillside.	Plants difficult to separate.	Boeke,J.D.	J.B.McElroy		269		MO	27-Oct	1976						6.46N 76.07W
Paepalanthus dendroides	cf.	COLOMBIA	Cauca	Paramo above Purace.	3350 m	[11000 feet]		Core,E.L.			272	A	NY	19-Feb	1944		TYPE: Paepalanthus karstenii var. corei				2.25N 76.43W
Paepalanthus pilosus var. pilosus		COLOMBIA	Cundinamarca	Mpio. Usme, Paramo de Sumapaz	3680 m			Roldán,F.J.			283		MO	27-Jul	1986						4.33N 74.18W
Paepalanthus pilosus var. pilosus		COLOMBIA	Cundinamarca	Paramo, Cruz Verde	3400 m			Kirkbride,J.H.			363		MO	6-Sep	1967						4.54N 74.04W
Paepalanthus pilosus var. pilosus		COLOMBIA	Cundinamarca	Paramo de Palacio (La Calera).	3600 m			van der Hammen,Th.			379		COL [COL000223796]	4-Jun	1952						4.72N 73.89W
Paepalanthus caryonauta		BOLIVIA	La Paz	Cordillera Real, Cocopunco	10,000 feet			Tate,G.H.			382		NY	24-Mar	1926						15.4S 68.47W
Paepalanthus pilosus var. pilosus		COLOMBIA	Cundinamarca	Paramo Cruz Verde, W slopes	3150 m		[big lax pilosus]	Cuatrecasas,J.			401		F	7-Oct	1938						4.54N 74.04W
Paepalanthus caryonauta X P. pilosus		COLOMBIA	Antioquia	Urrao, Paramo de Frontino, cerca al camino que va de la casa del Morro al Quince.	3450 m	En pantano.	Hierba en roseta, formadora de colchón, con flores blancas.	Roldán,F.J.	et al.		402		MO	11-Sep	1986						6.46N 76.07W
Paepalanthus pilosus var. pilosus		COSTA RICA	Limón	Cordillera de Talamanca, Valle Las Morrenas.	3500 m			Alfaro,E.	Curso Int. Flora Páramo de Chirripó		417		MO	25-Jan	1996			9 29'24"N	83 29'24"W	Tropicos	9.49N 83.49W
Paepalanthus dendroides		COLOMBIA	Antioquia	Finca El Venecia. Corregimiento Aragon, near rd Santa Rosa de Osos - Aragon.	2600 m			Roldán,F.J.	et al.		438		MO	7-Jun	1986						6.76N 75.51W
Paepalanthus pilosus var. pilosus		COSTA RICA	Cartago	Cerro de la Muerte, Pan-Am hwy, 5 km above Millsville (ca. 8 km above Nivel). Cordillera de Talamanca.	3400-3500 m	On Sphagnum, below shrubs. Shrub-paramo (Chusquea, Hypericum, Vaccinium).	Common cushion plant.	Holm,R.W.	H.H.Iltis		460		F,MO	22-Jul	1949						9.55N 83.75W
Paepalanthus pilosus var. pilosus		COSTA RICA	San Jose	Perez Zeledon. Parque Nacional chirripó, Cordillera de Talamanca, Sendero Valle Los Conejos y Cerro Chirripó.	3400-3739 m		Hierba. Flores rosadas.	Gamboa R.,B.	et al.		490		MO	27-Jul	1996			9 27'36"N	83 29'24"W	Tropicos	9.46N 83.49W
Paepalanthus pilosus var. pilosus		VENEZUELA	Lara [Trujillo!]	PN Dinira, Paramo de Jabón, laderas mirando havia al NE, vista al Tocuyo.	3000 m	Vegetacion paramera herbacea dominada por Chusquea y Espeletia.	cushions on wet sites. Localmente frecuente.	Riina,R.	et al.		522		F	13-Aug	1999			09 33'55"N	70 06'18"W	Label	9.55N 70.1W
Paepalanthus dendroides		PERU	Cusco	Paucartambo. Localidad Pavayoc. [internet says Santa Ana - Quillabamba, Pavayoc]	2600 m	En alfombra de cortas gramineas. Sitio pantanoso.		Woytkowski,F.			567		USM (photo)	14 Mar	1953	det from photo					12.89S 73.03W
Paepalanthus lodiculoides		PERU	Piura	El Talanco.				Acleto,C.			572		USM (photo)	13 Jun	1961	det from photo					5.08S 79.54W
Paepalanthus pilosus var. pilosus		COLOMBIA	Cundinamarca	Bogota DC, Localidad de Usme, Predio El Refugio EAAB. Y: 969299 X: 993671	3726 m	Frailejonal pajonal.	Hierba 4 cm, hojas con pubescencia en el margen. Infl con ped .. de 4 cm de largo.	Trujillo,L.			600		UDBC (online)	2-Aug	2011	filed as P. dendroides. Seems to have long peduncles at anthesis. Plants otherwise pilosus like.					4.29N 74.15W
Paepalanthus pilosus var. pilosus		COLOMBIA	Cundinamarca	Bogota DC, Localidad de Usme, Predio El Refugio EAAB. Y: 972515 X: 994114	3447 m	Frailejonal matorral.	Hierba de 6 cm, hojas verde rojizas. Infl con peciolos cortos.	Trujillo,L.			601		UDBC (online)	16-Aug	2011	filed as P. pilosus. Peduncles short.					4.33N 74.14W
Paepalanthus pilosus var. pilosus		COLOMBIA	Magdalena	Slopes of Cuchilla Chebachucua, which forms the S wall of the valley of Rio Duriameina.	3500 m	small patches in wet meadow, s slope. In bosque muy humedo montano zone.	filaments white with pale anthers turning darker with age. Lvs grasslike with edges inrolled and a few hairs on inside face.	White,S.	W.Alverson		642		MO	31-May	1977			10 38'N	73 38'W	Label adjusted	10.64N 73.63W
Paepalanthus dendroides		PERU	Cajamarca	Prov. Santa Cruz. Distr. de Pulan. El Progreso.	2700 m	Oconales. [wet depressions in valleys]	Herb. Fls white.	Santa Cruz, L.			653		USM	5 Aug	2006						6.79S 78.97W
Paepalanthus pilosus var. pilosus		VENEZUELA	Merida	Paramo de El Cupís, un sector del gran páramo de San José, mpio. San José, distr. Campo Elías.	3150 m		3-5 cm tall, agrupada en almohadillas convexas, compactas, de contorno más o menos orbicular y de 5-25 cm diameter, scapes 1-1.5 cm. Capitula 3-5 mm diam. [small cap with med. Elongate scapes] Abundante, heliófila.	Ruiz-Teran,L.E.	M. López-Figueiras		771		MICH	13-Aug	1970						8.35N 71.27W
Paepalanthus caryonauta		ECUADOR	Carchi	Tulcan-Maldonado hwy, km 29	3845 m			Boeke,J.D.			803		MO	24-Jan	1977						0.79N 77.88W
Paepalanthus caryonauta		BOLIVIA	La Paz	Tolapampa [sp?]	10,000 feet			Williams,R.S.			842		F	11 Sep	1901	dist'd as P. karstenii var. corei					15.4S 68.47W
Paepalanthus pilosus var. pilosus		COSTA RICA		Macizo de Buena Vista.	3200 m	Turba ennegrecida. En paramos.	plants forming small & dense convex carpets among moss, very tightly adhering to the 'turba'.	Jiménez,A.			855		F	17-Jul	1963						9.55N 83.76W
Paepalanthus dendroides		BRAZIL	Amazonas	Parque Nac. do Pico da Neblina, Formação Rochosa do PIco da Neblina.	2700 m	Terrestre. Ciófila.	Folhas concolores verdes.	Farney,C.	Pessoal do 1[o] B.F.E.		901		RB,IAN nv, SPF nv	21-Aug	1985						0.8N 66.01W
Paepalanthus caryonauta		PERU	Cusco	La Convencion, Huayopata, 7 km from the village of Incatambo; S side of the Lucumayo River.	3430 m	Subtropical rain paramo, on ridgeline in shrub-grassland area. Slope 35%. Growing in Moss.		Peyton,B.	S.Tilney Peyton		914		MO	4 Aug	1982						13.09S 72.53W
Paepalanthus pilosus var. pilosus		COLOMBIA	Norte de Santander	Cucutilla, Vereda Carrizal, páramo El Romeral.	3200-3800 m			Ortiz R., N.Y.	et al.	NYO-	978		COL [COL000066965]	25-Feb	2002	dense mat, short peduncles, pointy leaves					7.4N 72.87W
Paepalanthus karstenii		COLOMBIA	Cundinamarca	Paramo de Chipaque	3000 m			Triana			1022	[-5]	COL (online)	Dec	1855	Poss same as Karsten s.n. type of P. karstenii; det dendroides by Killip & Dugand	Topotype				4.46N 74.08W
Paepalanthus pilosus var. pilosus		COLOMBIA	Cundinamarca	Quebrada de Chapinero	9000 feet [=2740 m]			Schultes,R.E.			1024		NY	24-Sep	1941		TYPE: Paepalanthus schultesii				4.64N 74.04W
Paepalanthus pilosus var. pilosus		COLOMBIA	Cundinamarca	Usme Experimental Sta 10 km S of Usme.	3400 m	Occasional on wet ground. Open grassland with some shrub and paramo.		Smith,S.G.	et al.		1059		MO	15-Jun	1950						4.45N 74.08W
Paepalanthus pilosus var. pilosus		COLOMBIA	Boyacá	Between Soata and Cocuy; paramo del Alto del Escobal.	3750 m			Cuatrecasas,J.			1209		F	8-Sep	1938						6.34N 72.45W
Paepalanthus species A	aff. (small)	COLOMBIA	Norte de Santander	De La Laguna a Nariz de Judío (Mutiscua).		En el paramo.		Garganta,M.			1209		F	19-Jun	1946						7.28N 72.79W
Paepalanthus pilosus var. pilosus		ECUADOR	Loja	Fierro Urco, Saraguro-Loja, km 12.4 turnoff towards Fierro Urco, Km 23.8.	3840 m	Paramo frequently burned.		Jørgensen,P.M.	et al.		1241		MO	6 Dec	1994			03 43'10"S	79 19'18"W	Label	3.72S 79.32W
Paepalanthus lodiculoides		COLOMBIA	Cundinamarca	Paramo de Chisaca	3596 m	Páramo.	Forming solid cushioins ca 23 cm across. Plants uncommon.	Soderstrom,T.			1262		MO	26-Sep	1966						4.28N 74.2W
Paepalanthus dendroides		COLOMBIA	Boyacá	Mpio. Chiscas, vereda Duartes, sector Duartes Arriba, finca los Pantanos.	2850 m	Hierba de suelo pantanosa.		Galindo-T.,R.	et al.	RGT-	1303		COL000057819	8-Jul	2003			6 34'321"N	72 31'821"W	Label	6.57N 72.52W
Paepalanthus pilosus var. pilosus		COSTA RICA	Cartago/Limón/San José	[Cerro] Chirripó Grande	3450 m			Kupper,W.			1315		LL,M [M0137218]	27-Apr	1932		TYPE: Paepalanthus kupperi				9.46N 83.49W
Paepalanthus pilosus var. pilosus		COLOMBIA	Cundinamarca	Mpio. de Subachoque, Paramo de El Tablazo.	3400 m	Sobre rocas en sitios bien iluminados del paramo.	Forma cojines.	Hernandez Schmidt,M.	C.I. Orozco y estudiantes		1330		COL [COL000034189]	6-Oct	2003	Plants with short prostrate leaves (because growing in sun?)					5.03N 74.15W
Paepalanthus pilosus var. pilosus		COLOMBIA	Cundinamarca	Paramo de Chisaca				Soderstrom,T.			1346		MO	15-Oct	1966						4.33N 74.17W
Paepalanthus pilosus var. pilosus		COLOMBIA	Cundinamarca	Mpio. de Subachoque, Paramo de El Tablazo.	3400 m	Suelo encharcado. Pajonales de Calamagrostis, Agrostis & Festuca densamente salpicados con frailejones Espeletia barclayana, rosetas de Blechnum y Paepalanthus y arbustillos de Arcytophyllum, Bejaria, Diplostephium, Hypericum.	Forma pequenos colchones sobre suelo encharcado.	Hernandez Schmidt,M.			1432		COL [COL000034188]	12-Dec	2003	Plants with long narrow leaves compared to other Subachoque collection					5.03N 74.15W
Paepalanthus pilosus var. pilosus		ECUADOR	Zamora-Chinchipe	Tambo de Savanilla				André,E.-F.		K-	1438		F	18 Oct	1876	distr'd as E. microcephalum					4.45S 79.16W
Paepalanthus pilosus var. pilosus		COLOMBIA	Cauca	Popayan, near Laguna de Guanacas.	12000 feet			Hartweg,K.T.			1445		B,BM,E,K (holotype)		1842		TYPE: Erocaulon selaginoides Benth.				2.51N 76.21W
Paepalanthus pilosus var. pilosus		COLOMBIA	Boyacá	Nevado del Cocuy; alto valle de Las Lagunillas	4000-4300 m			Cuatrecasas,J.			1501		F	12-Sep	1938						6.46N 72.34W
Paepalanthus lodiculoides		COLOMBIA	Boyacá	Cordillera Oriental. Nevado del Cocuy; alto valle de Las Lagunillas	4000-4300 m			Cuatrecasas,J.			1537		F	12-Sep	1938		TYPE: Paepalanthus lodiculoides				6.47N 72.32W
Paepalanthus pilosus var. pilosus		COSTA RICA	San Jose	Cerro de la Muerte, near highest point on Pan-Am Hwy	3300 m			Weston,A.S.			1545		MO	31-Jul	1964			9 34'12"N	83 45'00"W	Tropicos	9.57N 83.75W
Paepalanthus pilosus var. pilosus		COLOMBIA	Boyacá	Planos de Toldadero	3950 m			Cuatrecasas,J.			1559	A	F	13-Sep	1938						6.45N 72.34W
Paepalanthus dendroides		PANAMA	Bocas del Toro	Valle de Silencia.	8200 ft	Acid bog. Treeless, very marshy.	Low growing 4-8" in height, forming dense clusters, not very common. Fls white.	Antonio,T.			1571		F,MO	8-Aug	1979						9.1N 82.9W
Paepalanthus pilosus var. leoniae		PERU	San Martin	Prov. Mariscal Caceres. Grassland in Paredones. NW sector Rio Abiseo Nat Park.	3600 m	Grassland.	Acaulescent herb.	León,B.	K.Young		1597		MO	16 Mar	1988	distributed as p. karstenii var corei	TYPE: Paepalanthus pilosus var. leoniae	07°40'16.73”S,	77°29’1.78” W	Leon (pers. comm.)	7.67S 77.48W
Paepalanthus pilosus var. pilosus		COLOMBIA	Boyacá	Cordillera Oriental. Nevado del Cocuy, alto del Puerto de Las Lagunillas.	4050 m			Cuatrecasas,J.	H.Garcia-Barriga		1612		COL (COL000223793)	13-Sep	1938						6.46N 72.34W
Paepalanthus pilosus var. pilosus		PERU	Amazonas	Prov. Chachapoyas. South side of Molinopampa-Diosan pass.	3100-3300 m	Locally frequent on moist banks.	Flowers greenish white.	Wurdack,J.J.			1616		F	5 Aug	1962	distributed as P. espinosianus					6.15S 77.66W
Paepalanthus pilosus var. pilosus		COSTA RICA	San Jose	Canton de Dota, R.F. Los Santos. Cuenca Del Pirris-Damas. Las Vueltas	3000 m		Hierba. Flores moradas.	Alfaro,E.			1633		MO	22-Apr	1998			9 36'36"N	83 51'36"W	Tropicos	9.61N 83.86W
Paepalanthus pilosus var. pilosus		COLOMBIA	Cundinamarca	Mpio. de Fómeque, Sector La Playa.(Flora del Parque Nacional Natural Chingaza)	3180 m	Subparamo.	Forma abundante necromasa y retiene gran cantidad de aguq. MUY COMUN.	Bernal,H.Y.	et al.		1647		COL [COL000066835]	31-Aug	1991	Paepalanthus sp. at COL					4.54N 73.76W
Paepalanthus pilosus var. pilosus		COSTA RICA	San José	Canton de Dota. Copey. Cerro Las Vueltas.	3159 m	En suelos organicos y humedos.	Infl exceeds plant by 1 cm.	Vargas,G.	J.Sánchez		1715		F,CR	15-Feb	1994						9.62N 83.85W
Paepalanthus pilosus var. pilosus		COSTA RICA	San José	Canton de Dota. Copey. Cerro Las Vueltas.	3159 m		Cushion-forming herb.	Vargas,G.	et al.		1749		F	28-Mar	1994						9.62N 83.85W
Paepalanthus pilosus var. pilosus		COLOMBIA	Magdalena	Sierra Nevada de Santa Marta, edge of Laguna Chubdula.	3480 m	Edge of Laguna	[glabrous] Mat-forming herb	Kirkbride,J.H.	E.Forero		1784		F	29-Jul	1972			10 55'N	73 53'W	Label adjusted	10.92N 73.87W
Paepalanthus pilosus var. pilosus		ECUADOR	Azuay	Road Sigsig-Gualaquiza, km 25.6. At the pass on military post road. Km 3.3 from pass to military post.	3200-3330 m	Wet paramo vegetation with large patches of Neurolepis	Cushion-forming herb. Inflorescence white flushed with violet.	Jørgensen,P.M.	et al.		1817		F,MO	11 Jan	2000			03 11'13"S	78 47'40"W	Label	3.19S 78.79W
Paepalanthus pilosus var. pilosus		ECUADOR	Azuay	Road Gualaceo-Limón (General Plaza Gutierrez), km 25.2. Side road at the pass to antennas and military post 1.5 km.	3540-3600 m	Grass páramo, very wet with Puya and Escallonia myrtilloides.	Cushion-forming herb. Infl grayish	Jørgensen,P.M.	et al.		1851		F,MO	12 Jan	2000			03 00'29"S to 03 00'51"S	78 39'43"W to 78 40'02"W	Label	3.01S 78.66W
Paepalanthus dendroides		COLOMBIA	Cundinamarca	Chapinero, near Bogota.	2700-2800 m	Wet open place, base of mountain.		Pennell,F.W.			1997		F	18 to 23-Sep	1917	dist'd as pilosus					4.64N 74.05W
Paepalanthus dendroides		PERU	Cajamarca	Prov. Santa Cruz. Distr. de Pulan. La Zanja.	2800 m	Pastizal de jalca.	Herb. Fls white.	Santa Cruz, L.			2018		USM	31 Jul	2007						6.79S 78.97W
Paepalanthus pilosus var. pilosus		COLOMBIA	Cundinamarca	Paramo de Cruz Verde near Bogota.	3300-3500 m	Wet mossy paramo	Herb. Flower white.	Pennell,F.W.			2074		F,MO	20-Sep	1917			04°33'59"N	074°02'00"W	Tropicos	4.54N 74.04W
Paepalanthus pilosus var. pilosus		PERU	Amazonas	Prov. Chachapoyas: Leimebamba-Chilchos trail. La Cordillera.		Jalca.	Cushion plant. Heads brown.	Boeke,J.D.			2133		MO,USM	4 Jul	1977	distr'd as P.stuebelianus					6.69S 77.75W
Paepalanthus pilosus var. pilosus		COSTA RICA	Cartago	Cerro Asuncion.	3400 m	Paramo.		Huft,M.	et al.		2163		MO	12-May	1982			9 34'12"N	83 45'00"W	Tropicos	9.57N 83.75W
Paepalanthus dendroides		PERU	Puno	in summis Cordiller. jugis pr. San Govan [mapped late]				Lechler,W. (ed. Hohenacker)			2206		P	July	1854	identified from photo online					13.52S 70.37W
Paepalanthus pilosus var. pilosus		ECUADOR	Loja	Road from Yangana to Cerro Toledo, km 18-22 to the antennas.	3150-3460 m	Rocky sandy paramo. Dry season.	Cushion-fomring herb. Flowers dirty white.	Jørgensen,P.M.	et al.		2209		F,MO	3 Nov	2000			04 22'28"S to 04 24'13"S	79 06'42"W to 79 06'40"W	Label	4.39S 79.11W
Paepalanthus pilosus var. pilosus		COSTA RICA	San José	Cerro Asunción del macizo de Buena Vista, Pcia. San José.	3325 m		Growing like pincushions. Already many are beginning to dry out.	Jiménez,A.			2231		F								9.57N 83.75W
Paepalanthus dendroides		PERU	Cusco	Paucartambo. A lo largo del camino de El Mirador a Acjanaco.	3500-3600 m	Entre Sphagnum y otras hierbas del pajonal, en areas de suelo con aparente mal drenaje.	Hierba arrosetada.	León,B.			2243		F	21 Jul	1990						13.16S 71.63W
Paepalanthus caryonauta		PERU	Cusco	Prov. Paucartambo. Camino peatonal de El Mirador a Cerro Macho Cruz. P.N. Manu	3500-3600 m			León,B.	K.Young		2245		F,USM	21 Jul	1990						13.14S 71.63W
Paepalanthus pilosus var. pilosus	cf.	COLOMBIA	Cundinamarca	Laguna Verjon, 'paramo de Choachi near Bogota'	3300 m	Wet open paramo.		Pennell,F.W.			2256		F,MO	27-Sep	1917	lvs rounded? very different from Pennell 2074					4.56N 74.02W
Paepalanthus pilosus var. pilosus		ECUADOR	Azuay	Road Sigsig-Gualaquiza, km 28. Paramos de Matanga.	3280-3330 m	Disturbed paramo, previously burnt and regenerating Dry season	Cushion-forming herb. Heads dirty-white. Specimens in alcohol before drying.	Jørgensen,P.M.	et al.		2366		F,MO	14 Nov	2000			03 11'48"S	78 47'09"W	Label	3.2S 78.79W
Paepalanthus caryonauta		PERU	Cusco	Prov. Paucartambo. Cerro Macho Cruz.		Escasa bajo gramineas. En Pajonal.		León,B.	K.Young		2431		USM (photo)	3 Sept	1990	det from photo					13.2S 71.61W
Paepalanthus pilosus var. pilosus		VENEZUELA	Merida	Laguna Mucubají.	3700 m		Hierba diminuta, afelpada.	Aristeguieta,L.			2442		F	Sept	1956						8.79N 70.83W
Paepalanthus pilosus var. pilosus		COLOMBIA	Cundinamarca	Cerro Monserrate [local guessed because of church N Sra Monserrate here and it's a hill]			Hieba rastrera de flores blancas.	Romero-Castañeda,R.			2492		F	26-Apr	1951						4.61N 74.05W
Paepalanthus pilosus var. pilosus		COLOMBIA	Cundinamarca [?]	[no locality data on label]				Mutis,J.C.			2551		MA-663379, 663380, 663381 (JSTOR, under P. karstenii 'orig material')		pre-1808	as P. karstenii original material in JSTOR. Not similar to karstenii type
Paepalanthus caryonauta X P. pilosus	cf.	COLOMBIA	Meta	Macizo Sumapaz entre Boqueron del Buque and Laguna del Nevado.	3600 m		Formando cojines. Flores blancas.	Diaz-Piedrahita,S.			2608		MO	7-Jul	1981	fls not maturing normally though involucres fully open					3.99N 74.2W
Paepalanthus dendroides		PERU	Cusco	Prov. Paucartambo. A lo largo de la trocha entre Acjanaco y Macho Cruz. P.N. del Manu.	3350 m	Hierba entre gramineas, en pajonal quemado, cerca al camino.		León,B.	N.Huapaya		2683		F,USM (photo)	2 Mar	1991						13.19S 71.62W
Paepalanthus pilosus var. pilosus		ECUADOR	Loja	Nudo de Sabanilla, 0-500 m W of (above) the pass on the Yangana-Valladolid road.	2800-2900 m	Shrub páramo with grass páramo ridges.	Forming dense cushions 10-30 cm diam	Molau,U.	B.Eriksen		3223		F,MO	24 Feb	1988			4 28'S	79 11'W	adjusted	4.45S 79.16W
Paepalanthus dendroides		COLOMBIA	Cauca	Paramo de Paletará.	3000 m			Espinal,L.S.	J.E.Ramos		3310		MO	18-Nov	1968						2.18N 76.5W
Paepalanthus dendroides		PERU	Cusco	Prov. Paucartambo. Acjanaco. Parque Nacional del Manu.	3400-3500 m	Pajonal alto, con arbustos abundantes en las partes rocosas. Pendiente 30-50 degrees.	Capitulos marrones.	Cano,A.			3361		F	3 May	1990						13.2S 71.62W
Paepalanthus pilosus var. pilosus		COSTA RICA	San José [?]	En la base casi plana del Cerro Asunción.	3300 m	asoc. a menudo con Arcytophyllum muticum.	Infl dirty white, short scapes forming small cushions.	Jiménez,A.			3396		F	28-Jul	1965						9.57N 83.75W
Paepalanthus pilosus var. pilosus		PERU	Amazonas	Prov. Bagua. Cordillera Colán NE of La Peca.	10800 feet (3290 m)	Humid pajonal.	Flowers green and brown with white anthers.	Barbour,P.			3427		F,MO	9 Sep	1978						5.55S 78.32W
Paepalanthus pilosus var. pilosus		COLOMBIA	Boyacá	Paramo de la Rusia betw la Osera y Quebrada de la Esperanza (station 78) on rd betw Duitama and Charalá. [border of Boyacá and Santander]	3624 m	In bog.		Langenheim,J.H.			3508		MICH (ex UC)	20-Aug	1953	filed as P. karstenii at MICH					5.97N 73.08W
Paepalanthus lodiculoides		COLOMBIA	Boyacá	Páramo del Pedrisco near km marker 270 on road to Pajarito from Sogamoso.	3000 m	Among grasses along rocky ridges. Evidence of much burning and clearing for cultivation.	Common small shrub, flowers white-lavender.	Langenheim,J.H.			3589		F,MO	27-Aug	1953						5.53N 72.79W
Paepalanthus pilosus var. pilosus		COLOMBIA	Cundinamarca	La Calera, Paramo de la Siberia.	3000-3500 m	In bog.		Langenheim,J.H.	et al.		3688		MICH (ex UC)	16-Sep	1953	filed as P. karstenii at MICH					4.72N 73.89W
Paepalanthus pilosus var. pilosus		ECUADOR	Loja	Yangana - Valladolid, km 1.1. Track to Sierra Toledo, km 16	3150 m	Shrub paramo on rocky slopes and trackside embankments. Locally common on embankments.	Cushion-forming herb.	Lewis,G.P.	B.Klitgaard		3726		MO	14 Nov	1997			04°23'S	079°06'W	Label	4.39S 79.11W
Paepalanthus Species A		COLOMBIA	Cesar	Paramo de Sabana Rubia [Serrania de Perija?]	3250 m			Cuadros,H.			3732		MO	22-Jul	1987						10.35N 72.91W
Paepalanthus caryonauta		PERU	Cusco	Prov. Paucartambo. Alturas de Lali. Parque Nacional del Manu.	3750-3850 m	Pajonal con oconales y laderas rocosas. Pendiente 0-50 degrees.		Cano,A.			3872		F,USM	18 Jul	1990						13.09S 71.63W
Paepalanthus caryonauta		PERU	Cusco	Alturas de Lali. Parque Nacional del Manu	2750-2850 m?? (see Cano 3872)	Pajonal con oconales y laderas rocosas.	Hierba abundante en zona pantanosa.	Cano,A.			3873	a	USM (photo)	18 Jul	1990	small frag, separated from 3873? (Trichophorum rigidum)					13.09S 71.63W
Paepalanthus caryonauta		PERU	Cusco	Prov. Paucartambo. Cerro Macho Cruz. Acjanaco. P.N. Manu.	3450 m	Pajonal bajo quemado. Pendiente 5-20.	Hierba cespitosa. Frecuente en suelos húmedos.	Cano,A.			4024		F,USM	30 Aug	1990						13.21S 71.6W
Paepalanthus pilosus var. pilosus		COLOMBIA	Cundinamarca	Subparamo near Guasca	3000-3400 m			Barclay,H.G.			4031		MO	13-Jun	1957	det as karstenii vel aff by NH 2011					4.84N 73.83W
Paepalanthus pilosus var. pilosus		ECUADOR	Loja	Km 21 on rd Yangana-Cerro Toledo; then, trail from Cerro Toledo (ca 300 m below antennas) towards Numbala (to 1 km down the trail.)	3350 m	Cool very rainy, windy paramo		Grant,J.	et al.	01-	4041		MO	14 Feb	2001			04 24'01"S	79 06'42"W	Label	4.4S 79.11W
Paepalanthus pilosus var. pilosus		COLOMBIA	Boyacá	Duitama, Paramo de Belen.	3900 m			Rangel, J.O.	et al.		4045		MO	30-Sep	1986			06 01'35"N	72 57'08"W	Label adjusted	6.03N 72.96W
Paepalanthus pilosus var. pilosus		COLOMBIA	Boyacá	Duitama, Paramo de Belen	3900 m.		Rastrera'	Rangel, J.O.	et al.		4048		MO	30-Sep	1986			06 01'35"N	72 57'08"W	Label	6.03N 72.95W
Paepalanthus pilosus var. pilosus		COLOMBIA	Cundinamarca	Paramo near Guasca.				Barclay,H.G.			4057		MO	13-Jun	1957						4.84N 73.82W
Paepalanthus pilosus var. pilosus		COLOMBIA	Cundinamarca	Paramo de Guadalupe betw Bogota and Choachi.	2700 m			Barclay,H.G.			4093		MO	21-Jun	1957	det as karstenii vel aff by NH 2011					4.57N 74.05W
Paepalanthus pilosus var. pilosus		COLOMBIA	Cundinamarca	Above Llano Chiquita nursery, Represa de Neusa	3500 m.			Barclay,H.G.			4150		MO	22-Jun	1957						5.13N 74W
Paepalanthus caryonauta		PERU	Junin/Cusco	Prov. Satipo/La Convencion. Cordillera Vilcabamba. Río Ene slope, near summit of divide.	3350-3400 m	Mossy upper montane forest dominated by Weinmannia, Clethra, Symplocos and Myrsine.	Mat forming. Terrestrial.	Boyle,B.	et al.		4219		F, USM	8 Jun	1997			11 39'36"S	73 40'02"W	Label	11.66S 73.67W
Paepalanthus pilosus var. pilosus		VENEZUELA	Merida	Distrito Justo Briceño. Páramo y chirivital en la vertiente NW del Alto del Totumo, hoya del Río Chirurí, a 19.5 km de El Aguila por la carretera a Piñango.	3900-4000 m	Paramo y chirivital. Laderas abiertas.	Planta de cojín. Muchas rosetas juntas.	Berry,P.			4229		F	11-Oct	1983						8.93N 70.85W
Paepalanthus pilosus var. pilosus		VENEZUELA	Merida	Distrito Justo Briceño. Páramo y chirivital en la vertiente NW del Alto del Totumo, hoya del Río Chirurí, a 19.5 km de El Aguila por la carretera a Piñango.	3900-4000 m		Hierba arrosetada, muchas yemas formando cojín.	Berry,P.	R.Calvo		4346		F,MO	21-Aug	1984						8.93N 70.85W
Paepalanthus pilosus var. pilosus		VENEZUELA	Merida	8.8 km on trail from San Jose de Acequias to Mucutuy	3120 m		Hierbas arrosetadas en cojĩn, de unos 5-10 cm de alto.	Berry,P.			4366		F,MO	22-Aug	1984						8.39N 71.25W
Paepalanthus pilosus var. leoniae		PERU	San Martin	Prov. Mariscal Caceres. Puerta del Monte. NW corner of Rio Abisea National Park.	3450 m	High elevation grassland on bottom of u-shaped valley.	Small mat-forming herb. Uncommon. Associated with Sphagnum.	Young,K.	B.León		4368		F	10 Jul	1987			7°39'30.20"S	77°28'13.67"W	Leon (pers. comm.)	7.66S 77.47W
Paepalanthus pilosus var. pilosus		VENEZUELA	Merida	Dtto. Justo Briceño. 35 km de El Aguila on rd to Pinango	3400 m		Planta arrosetada formando cojines.	Berry,P.			4392		F,MO	9-Nov	1984						8.99N 70.89W
Paepalanthus pilosus var. pilosus		PERU	Amazonas	Chachapoyas. [prob W of Molinopampa]	3000 m		[Forming mats at edges of small clumps of shrubs - see Weberbauer habitat notes in book]	Weberbauer,A.			4416		F(frag ex G)								6.16S 77.68W
Paepalanthus dendroides		PERU	Cusco	Prov. Paucartambo. Acjanaco. Cerro Macho Cruz. P.N. Manu	3400-3450 m	Pajonal bajo quemado. Suelo pantanoso.	Abundante en suelo pantanoso.	Cano,A.			4437		F	2 Mar	1991						13.2S 71.62W
Paepalanthus pilosus var. pilosus		COLOMBIA	Antioquia	Mpio. Urrao: Paramo Frontino, Llano Grande and hill to north.	3320-3450 m	In wet sphagnum with Espeletia. Small areas of dense mossy forest intermixed with open Espeletia paramo.	Mound mat-former in sun. Mounds to 0.5 m in diameter.	MacDougal,J.	F.J.Roldan		4463		MO	2-Mar	1989			06 28'N	76 05'W	Tropicos	6.47N 76.08W
Paepalanthus caryonauta		PERU	Cusco	Prov. Paucartambo. Cerro Macho Cruz. Acjanaco. P.N. Manu.	3400-3450 m	Pajonal bajo quemado. Abundante ien suelo pantanoso.	Hierba.	Cano,A.			4465		F p.p., USM p.p.	2 Mar	1991	F & USM sheets mixed with P. dendroides, only 1 plant dendroides on F sheet.					13.2S 71.61W
Paepalanthus dendroides		PERU	Cusco	Prov. Paucartambo. Cerro Macho Cruz. Acjanaco. P.N. Manu.	3400-3450 m	Pajonal bajo quemado. Abundante ien suelo pantanoso.	Hierba.	Cano,A.			4465		F p.p., USM p.p.	2 Mar	1991	F one plant in packet, rest of sheet is caryonauta; one plant at lower right on USM sheet, rest is caryonauta					13.2S 71.62W
Paepalanthus pilosus var. pilosus		COLOMBIA	Cundinamarca	Boqueron de Chipaque.	3350 m			Barclay,H.G.			4489		MO	12-Jul	1957						4.46N 74.08W
Paepalanthus pilosus var. leoniae		PERU	San Martin	Prov. Mariscal Caceres. Pastizada de la Empedrada	3750-3785 m	Entre manojos de Calamagrostis.	Hierba arrosetada.	León,B.	K.Young		4579		USM (photo)	27 Jul	2000	det from photo		07°40'16.73”S	77°29’1.78” W	Leon (pers. comm.)	7.67S 77.48W
Paepalanthus dendroides		COLOMBIA	Antioquia	Mpio. Belmira, Paramo el Morro.	3130 m	En laguna, mezclada con Sphagnum, CYP y otras familias.	Abundante. Hoja verde claro, infl blanco sucio.	Fonnegra,R.	D.Tuberquia		4650		F	22-Apr	1993			06 35'N	75 32'W	Label adjusted	6.62N 75.64W
Paepalanthus lodiculoides		COLOMBIA	Cundinamarca	Páramo de Sumapaz, lagunas de Chisacá.	3600 m	Crece en las turberas secas por el 'verano' a orilla de la laguna.		Uribe,L.			4672		MO	15-Feb	1964						4.28N 74.2W
Paepalanthus caryonauta		ECUADOR	Pastaza [Carchi?]	Paramo del Angel.	3700 m	Bog on high ridge.		Barclay,H.G.			5136		MO	23-Aug	1957						0.74N 77.93W
Paepalanthus dendroides		PERU	Cusco	Acjanaco. Parque Nac. Manu.	3450-3500 m	Oconal. Suelo muy humedo.	Frecuente.	Cano,A.	O.Aguilar		5152		USM (photo)	19 Mar	1992	det from photo					13.2S 71.62W
Paepalanthus caryonauta		COLOMBIA	Cauca	Purace - La Plata paramo	3200 m	Very wet, boggy.	Cushion 70 cm in circumf & 15 cm high, similar to 5136 at El Angel. Only one cushion found here.	Barclay,H.G.			5176		F,MO	22-Aug	1957						2.38N 76.22W
Paepalanthus dendroides		PERU	Huanuco/Pasco	Villcabamba, Hacienda on Rio Chinchao. [Huanuco, ca 100 km NW of Yanachaga-Chemillen is mouth Rio Chinchao 09 30'S 75 56'W on geographic.org]	6000 feet	Sphagnum banks.		Macbride, J.F.			5182		F	17 to 26 July	1923	distributed as P. pilosus					9.63S 76.07W
Paepalanthus pilosus var. pilosus		VENEZUELA	Merida	Distr. Rangel. Paramo de Santo Domingo, near Hotel Los Frailes. P.N. Sierra Nevada.	3000 m	Heavily grazed paramo. Under rock overhang.	Low rosettes.	Dorr,L.J.	L.C.Barnett		5185		F	18-May	1988			08 49'N	70 47'W	Label	8.81N 70.78W
Paepalanthus pilosus var. pilosus		VENEZUELA	Trujillo	Distrito Carache, Paramo Turmal below Pico Jabón.	3000 m	Paramo.	Mat-forming herb.	Dorr,L.J.	et al.		5317		F	27-May	1988			9 30'N	70 06'W	Label	9.55N 70.1W
Paepalanthus pilosus var. pilosus		PERU	Cajamarca	Prov. Jaén. Sallique. Localidad El Páramo (Huaca brava).	3400 m	Paramo.	Cespitosa. Flores blancas y anteras blancas. Almohadillas.	Campos,J.	et al.		5334		F,MO	22 Jul	1998			05 40'51"S	79 19'00"W	Label	5.68S 79.32W
Paepalanthus dendroides		PANAMA	Bocas del Toro	Trail S of Cerro Itamut leading to La Ventana.	3200 m	In swamp.	Cushion forming herb.	Monro,A.K.	S.Knapp		5369		MO	17-Mar	2006			9 05'40"N	82 53'06"W	Label	9.09N 82.89W
Paepalanthus dendroides		COLOMBIA	Antioquia	Mpio. Belmira, Finca El Paramo.	3000-3130 m	Terrestre.	Hojas verde grisaceas. Formando cojines compactos	Fonnegra,R.	et al.		5408		F	29-Jan	1995			06 35'N	75 32'W	Label adjusted	6.66N 75.67W
Paepalanthus pilosus var. pilosus		COLOMBIA	Cundinamarca	Macizo de Bogota: Entre Alto de las Cruces-La Viga y Diego Largo.	3380-3320 m	Paramo.		Cuatrecasas,J.			5553		F	19-Jun	1939
Paepalanthus dendroides		COLOMBIA	Santander	1 km SW of La Tico and ca 11 km NE of Berlin on rd to Pamplona (Norte de Santander).	3330 m.	Paramo. Locally abundant in wet meadow.		Stuessy,T.	V.A.Funk		5612		MICH	18-Jul	1979	filed as P. pilosus at MICH					7.21N 72.84W
Paepalanthus pilosus var. pilosus		PERU	Lambayeque	Ferreñafe, Cañaris.	3253 m	Matorral. Montano bajo.	Hierba terrestre, flores en cabezuelas blancas.	Chocce,M.	et al.		5688		USM (photo)	22 Apr	2010	det from photo					6.1S 79.28W
Paepalanthus dendroides		COLOMBIA	Cauca	Valle de las Papas, macizo colombiano [tropicos data]. But label data at MO is: Cauca: Macizo Colombiano, near Valencia, no mention 'Valle de las Papas', cf. Barclay 5847	3090 m			Barclay,H.G.			5730		MO	24-Sep	1958						1.88N 76.7W
Paepalanthus dendroides		COLOMBIA	Cauca	Tropicos: Macizo. Near Hda Los Andes, 3150 m. MO label: Cauca: Macizo Colombiano; Valle de las Papas 3140 m.	3140 m			Barclay,H.G.			5847		MO	30-Sep	1958						3.91N 75.86W
Paepalanthus dendroides		COLOMBIA	Boyacá	Mpio. Duitama, via El Carmen-Virolin.	2320 m	Lugares encharcados. Vegetacion arbustiva sobre formacion rocosa y pendiente.	Abundante, escapo verde.	Betancur,J.C.	et al.		5854		COL (online)	24-Nov	1994						5.97N 73.2W
Paepalanthus pilosus var. pilosus		VENEZUELA	Tachira [Apure?]	WSW slopes of Pata de Judio.	3100-3500 m	Grass páramo.	Abundant.	Luteyn,J.	et al.		5927		MO	19-Oct	1978						7.43N 72.31W
Paepalanthus pilosus var. pilosus		COSTA RICA		Near hotel, north-facing slope, Cerro Frio, Buenavista massif.	3350 m		Cushions.	Weston,A.S.			5986		F,MO	28-Aug	1969						9.55N 83.76W
Paepalanthus caryonauta		ECUADOR	Carchi	ca 12 mi N of El Angel in Paramo El Angel	3500 m	Growing with Espeletia		Humbles,J.E.			6086		MO	4-Jan	1973						0.71N 77.85W
Paepalanthus pilosus var. pilosus		COLOMBIA	Cundinamarca	Paramo de Chisaca al sur de Usme, Laguna Grande.	3900 m	Open paramo dominated by Espeletia and grasses. Alrededores de Laguna.		Barclay,H.G.	P.Juajibioy		6097		MO	9-Nov	1958						4.29N 74.21W
Paepalanthus lodiculoides		COLOMBIA	Cundinamarca	Cordillera Oriental al sur de Usme. Páramo de Chisacá. Alrededores de Laguna Grande.	3900 m	Near edge of lake, between hummocks.	Stems with very fine pointed leaves, growing together in small clumps.	Barclay,H.G.	P.Juajibioy		6113		F,MO	9-11 Nov	1958						4.28N 74.2W
Paepalanthus dendroides		COSTA RICA		On Cerro Kamuk, between peaks	3000 m	In bog below paramo.	Small cushions; heads white.	Weston,A.S.			6164		F	Sep	1969						9.24N 83.06W
Paepalanthus pilosus var. pilosus		VENEZUELA	Mérida	Distr. Rangel; Laguna Brava, entre el rio Los Granates y Loma de Paja, paramo de Los Granates, unos 15 km al E de la Sierra Nevada de Santo Domingo.	3380-3400 m			Ruiz-Teran,L.E.			6274		MICH	14-Sep	1971	filed as P. subsessilis at MICH					8.72N 70.86W
Paepalanthus dendroides		COLOMBIA	Antioquia	Bello, Vereda San Felix, 7.6 km from Medellin-San Pedro rd, on rd to communications towers.	3050 m	Montane vegetation, subparamo. On wet sloping ground.	Mat-forming plants.	Zarucchi,J.	Echeverri		6332		MO	7-May	1988			06 21'N	75 39'W	Label	6.34N 75.65W
Paepalanthus pilosus var. pilosus		VENEZUELA	Mérida	Distr. Campo Elías. Alrededores Laguna de Minanón[?] (= La Saraviada[?]) unos 15 km al S del pueblo de San José, paramo de El Rejo.	3400 m			Ruiz-Teran,L.E.			6694		MICH	22-Dec	1971	filed as P. subsessilis at MICH					8.32N 71.35W
Paepalanthus lodiculoides		COLOMBIA	Cundinamarca	Bogotá, DC. Parque Natural de Sumapaz. Camino entre La Union y La Pedregal hacia la laguna La Tabla.	3350-3720 m	Paramo y subparamo.	Formando apretados cojines, cerca a la orilla de la laguna.	Betancur,J.C.			6935		MO	13 to 15-Jan	1997			03 57'N	74 20'W	Label	3.95N 74.33W
Paepalanthus lodiculoides		COLOMBIA	Cundinamarca	Chisacá.	3900 m			Barclay,H.G.			7183		MO	22-Mar	1959						4.28N 74.2W
Paepalanthus dendroides		COLOMBIA	Santander/Norte de Santander	Paramo de la Laguna. between Pamplona & Bucaramanga.	2900 m	Bog on paramo.		Alston,A.H.G.			7333		F	26-Feb	1939						7.32N 72.82W
Paepalanthus pilosus var. pilosus		COSTA RICA	Cartago	Cerro de la Muerte, Cordillera de Talamanca. Interamerican Hwy. Ruta 2, km 89	3150 m	Paramo.	Cushion plant, cespitose.	Crow,G.	D.I.Rivera		7400		F,CR	19-Oct	1989			9 04'N	83 45'W	Label	9.56N 83.75W
Paepalanthus pilosus var. pilosus		COLOMBIA	Boyacá	El Cocuy	4390 m			Barclay,H.G.			7432		MO	18-Apr	1959						6.47N 72.33W
Paepalanthus dendroides		COLOMBIA	Boyacá	Belen, Huina [didn’t locate] - but mapped approx	3250 m			Barclay,H.G.			7629		MO	7-May	1959						6.02N 72.9W
Paepalanthus pilosus var. pilosus		COLOMBIA	Cundinamarca	Bogota-Usme rd, Paramo de Chisaca, km 28-33.	3375-3450 m		mat-forming herb.	Luteyn,J.	et al.		7755		MO	17-May	1979			04 17'47"N	74 13'56"W	Label adjusted	4.29N 74.23W
Paepalanthus pilosus var. pilosus		COLOMBIA	Cundinamarca	Choachi	3400 m			Barclay,H.G.			7757		MO	18-Jun	1959						4.56N 74W
Paepalanthus caryonauta		PERU	Cusco	Paucartambo. Pillahuata, alrededores, Tres Cruces, ca 130 km de Cusco en el camino hacia Pilcopata.	2000 m	Hierba postrada junto con el pasto.		Núñez, P.			7773		F p.p.,USM p.p.	4 Apr	1987	mixed with 'dendroides'		13 05'S	71 30'W	Label adjusted	13.08S 71.49W
Paepalanthus dendroides		PERU	Cusco	Prov. Paucartambo. Pillahuata, alrededores, Tres Cruces, ca 130 km de Cusco en el camino hacia Pilcopata.	2000 m	Hierba postrada junto con el pasto.		Núñez, P.			7773		F p.p.,MO,USM p.p.	4 Apr	1987	F, USM sheets mixed with P. caryonauta; previous det P. stuebelianus		13 05'S	71 30'W	Label adjusted	13.08S 71.49W
Paepalanthus caryonauta X P. dendroides		PERU	Pasco	Dist. Huancabamba. Sector Santa Barbara. Parque Nacional Yanachaga-Chemillén.	3200-3250 m	Bosque montano muy húmedo. En humedales.	Hierba postrada.	Monteagudo,A.	et al.		7938		F,MO	27 Jan	2005			10 12'S	75 22'W	Label	10.31S 75.66W
Paepalanthus pilosus var. pilosus		VENEZUELA	Lara	Dtto. Moran. Trail from Humocaro to Buenos Aires (Caserio) below Paramo Las Rosas.	3000-3400 m			Liesner,R.	et al.		8065		MO	24-Jun	1979						9.59N 70.12W
Paepalanthus pilosus var. pilosus		COLOMBIA	Cundinamarca	Paramo de Guasca, west side.	3000-3500 m			Garcia-Barriga,H.			8113		MO	11-Oct	1939						4.84N 73.81W
Paepalanthus caryonauta		PERU	Cusco	Distrito Huayopata, sector San Luis.	2995-3504 m	Bosque primario intervenido.	Hierba prostrada.	Valenzuela,L.	et al.		8117		F,MO	24 Nov	2006		TYPE: Paepalanthus caryonauta	13 04'22"S	72 22'54"W	Label	13.07S 72.38W
Paepalanthus pilosus var. pilosus		COLOMBIA	Cundinamarca	Cruz Verde	11000 feet		[tiny]	Dwyer,J.D.			8186		MO	27-Aug	1967						4.54N 74.04W
Paepalanthus pilosus var. pilosus		COLOMBIA	Cundinamarca	Paramo, Cruz Verde	11000 feet			Dwyer,J.D.	J.Idrobo		8189		MO	27-Aug	1967						4.54N 74.04W
Paepalanthus caryonauta		ECUADOR	Carchi	Rd Tulcan-Maldonado at the pass, 38 km from Tulcan.	4000 m	Growing along a stream. Boggy depression in Espeletia paramo, dominated by cushion plants (Plantago rigida, Distichia, Werneria), and adjacent wet slopes.	Forming firm cushions along a stream.	Ollgaard,B.	H.Balslev		8460		MO	4-Aug	1976	distributed as E. microcephalum					0.78N 77.95W
Paepalanthus pilosus var. pilosus		VENEZUELA	Apure	Bajada de los Huevos, unos 500 m al E del Sitio La Línea, vertiente oriental del gran paramo de Tamá, muy cerca de la frontera Colombo-Venezolana, distr. Paéz.	3100 m		Hierba mínima, musciforme, cojines densos, do contorno mas o menos circular y 6-10 cm diam, hojas deltado-lineares, 8-10 mm long, ciliate. scapes exsert up to 4 cm. [but very short in this specimen]. Capitula hemispheric 3.5-4 X 5-6 mm. Frequent.	Ruiz-Teran,L.E.	M. López-Figueiras		8555		MICH	26-Jun	1973	filed as P. karstenii at MICH					7.44N 72.28W
Paepalanthus pilosus var. pilosus		ECUADOR	Azuay	Gualaceo, Paramo de Patacocha	3500 m	Cienega below peak		Barclay,H.G.			8656		MO	7-Aug	1959						3.01S 78.66W
Paepalanthus pilosus var. pilosus		VENEZUELA	Trujillo	Parque Nac Guaramacal. Trail from the antennas on the summit of the Paramo de Guaramacal, SW to Paramo El Pumar.	2800-3100 m	Paramo vegetation.	Low rosette to mat-forming plant in wet areas.	Dorr,L.J.	et al.		9005		F	15-Jun	2001						9.19N 70.22W
Paepalanthus pilosus var. pilosus		ECUADOR	Loja	Pindal. Parque Nac. Podocarpus, along road from Yangana to radio towers on Cerro Toledo.	2900-3200 m	Mostly collected in shrubby paramo 3200 m, a few plants in cloud forest at 2900 m		van der Werff,H.	W.Palacios		9162		MO	29 Apr	1987			04°23'S	079°07'W	Label	4.39S 79.11W
Paepalanthus lodiculoides		COLOMBIA	Boyacá	Páramo de la Sarna entre Sogamoso y Vado Hondo, 5 km al NE de la Laguna de Tota.	3510 m	Vertiente seco poco húmedo, con Oreobolus obtusangulus, Rhynchospora paramorum, Espeletia congestiflora y Xyris acutifolia. Suelo arenoso.	Rosette herb.	Cleef,A.	et al.		9214		LL	30-Mar	1973		TYPE: Paepalanthus lodiculoides var. floccosus				5.58N 72.84W
Paepalanthus caryonauta		ECUADOR	Carchi	Paramo el Angel.	3750 m			Barclay,H.G.			9374		MO	28-Sep	1959						0.75N 77.91W
Paepalanthus pilosus var. pilosus		COLOMBIA	Cundinamarca	Cord Oriental, vertiente oriental, Paramo de Guasca	3200-3300 m	Pajonales con escaso fruticetum.	pulvinetum in turberas	Cuatrecasas,J.			9502		F	2-Jun	1940						4.81N 73.82W
Paepalanthus pilosus var. pilosus		ECUADOR	Azuay / Morona-Santiago	Prov Azuay / Morona-Santiago: Muletrack Sevilla de Oro-Mendez, at the pass and adjacent slopes (Paramo de Castillo).	3250-3500 m	Windswept ridges with recently burnt grass paramos and adjacent scrubby forest. Strongly wind-exposed places in the pass.	Cushion forming.	Ollgaard,B.	H.Balslev		9557		F	16 Sep	1976	distr'd as P. espinosianus		2 48'S	78 36'W	Label	2.8S 78.6W
Paepalanthus pilosus var. pilosus		VENEZUELA	Merida	Sierra de Santo Domingo, paramo de Mucubaji, Laguna Grande	3560-3600 m	Under the overhang of a rock. Open slopes dominated by Espeletia, surrounding lake in basin, some separated by wet quebradas draining to lake. Coarse gravel, some large rocks, mostly incomplete ground cover.	Small rosettes with long hairs on leaves.	Barclay,H.G.	P.Juajibioy		9565		COL online,MO	19-Nov	1959						8.79N 70.83W
Paepalanthus lodiculoides		ECUADOR	Loja	Muletrack Amaluza-Palanda, western slope, near the pass (at Laguna Areviatadas Pilares)	3350-3450 m	Grass paramo w/lg sloping bogs toward the lakes and up to 3 m high scrub in protected places	Forming firm cushions in wet places.	Ollgaard,B.	H.Balslev		9717		F	22-Sep	1976						4.58S 79.33W
Paepalanthus pilosus var. pilosus		COLOMBIA	Santander	Cordillera Oriental, Paramo del Almorzadero, region media	3500-3700 m			Cuatrecasas,J.			9980		F	20-Jul	1940						6.98N 72.73W
Paepalanthus dendroides		PANAMA	Bocas del Toro	Cerro Fabrega and vicinity, south of summit.	3150-3335 m	Wet boggy areas but without sphagnum (sphagnum is usu in assoc w/Chusquea or ericads). Vegetation mostly well under 50 cm	Common. Dense cushion tussock. Fls white. 2 species?	Weston,A.S.			10151		MO	7 to 8-Apr	1977			9 06'40"N	72 52'29"W	Label	9.11N 82.87W
Paepalanthus huancabambensis		PERU	Piura	Prov. Huancabamba. Cordillera Chinguela (Sapalache El Cármen)	2900 m	Jalca.		Sagástegui,A.	et al.		10225		MO	15 Sep	1981						5.14S 79.39W
Paepalanthus caryonauta	cf. (hybrid?)	COLOMBIA	Norte de Santander	Cordillera Oriental; Paramo de Santurban, extreme east	3300-3500 m		Flor blanca.	Cuatrecasas,J.	H. Garcia Barriga		10302		F	27-Jul	1940						7.28N 72.77W
Paepalanthus pilosus var. pilosus		COLOMBIA	Santander	Paramo del Almorzadero	3600 m			Barclay,H.G.			10394		MO	1-Jan	1960						6.98N 72.73W
Paepalanthus lodiculoides		COLOMBIA	Santander	Paramo de Almorzadero.	3600 m			Barclay,H.G.			10412		MO	1-Jan	1960						6.98N 72.73W
Paepalanthus pilosus var. pilosus		COLOMBIA	Cundinamarca	Paramo de Cruz Verde	3400-3500 m			Cuatrecasas,J.			10455		F	15-Sep	1940						4.54N 74.04W
Paepalanthus dendroides		COLOMBIA	Antioquia	1-4 km N of Las Ventanas along Pan-Am Hwy	1730-1920 m	Growing in seepage. Roadside thickets and heavily disturbed cloud forest.	Perianth grayish-white.	Luteyn,J.	et al.		10737		F	26-May	1984			07 02'N	75 30'W	Label adjusted	7.03N 75.46W
Paepalanthus dendroides		COLOMBIA	Antioquia	Vereda Llanos de Cuiva, 75 km NE of Medellin on road to 'La Argentina'.	2910 m	Subparamo perturbado.	Hierba con setas anegadas.	Callejas,R.			10839		MO	23-Apr	1993			06 55'N	75 56'W	Label adjusted	6.89N 75.52W
Paepalanthus caryonauta		PERU	Cusco	Prov. La Convencion. Cordillera Villcabamba expedition. On west-facing dryish slopes from Camp 5 to Camp 6, but mostly at Camp 6 in grasslands at c 3100-3500 m.	3100-3500 m	On west-facing dryish slopes from camp 5 to camp 6, but mostly at camp 6 in grasslands .. Common element of elfin forest at this altitude; esp Camp 6, at c 3300 m.	Common scattered in dense 'moss' hummocks and extending up to camp 7 grasslands at 3500 m or more. Uncommon hummock plant, forming dense clumps in the 'moss' substrate; lvs dark green and glossy.	Dudley,T.R.			11060		F	14 Jul	1968			12 36'S	73 30'W	Label	12.51S 73.49W
Paepalanthus caryonauta		PERU	Cusco	Prov. La Convencion: ca 28 km walking distance NE from Hacienda Luisiana and the Apurimac River.	3400-3600 m	Scattered in high, wet grassland and elfin forest on summit ridges at Camp 7. Particular to the grasslands.	Caespitose cushion mounds, 1-2 inches tall and 2-3 feet across. Leaves dark green. Rare. Scattered in wet grasslands here at camp 7; commoner in open but wet sites at camp 6.	Dudley,T.R.			11194		F,MO,USM	17 Jul	1968			12 30'S	73 30"W;74 30"	Label	12.38S 73.56W
Paepalanthus pilosus var. pilosus		COLOMBIA	Cundinamarca	Sopó	2700 m			Schultes,R.E.			11590		MO	14-Feb	1951						4.92N 73.93W
Paepalanthus dendroides		COLOMBIA	Antioquia	Mpio. Belmira, Vereda El Páramo, sitio El Paramo en area del Alto de Santa Ines, 6 horas de camino al NE de Belmira.	2900-3100 m	Area de bosques secundarios. Hierba acuatica, creciendo con Sphagnum en pequenos pantanos. Comun.		Callejas,R.	et al.		11608		MO	8-Aug	1995			06 32'N	75 53'W	Label	6.66N 75.67W
Paepalanthus pilosus var. pilosus		COSTA RICA	San Jose	Cerro de la Muerte, Talamanca range, high point on Pan-Am Hwy	3400 m	vegetation false paramo.		Taylor,R.J.,Jr.	C.E.S.Taylor		11738		MO	8-Aug	1972			9 33'43"N	83 45'23"W	Tropicos	9.56N 83.76W
Paepalanthus dendroides		COLOMBIA	Nariño	Putumayo': Paramo de Santa Lucia (nacimiento del rio Alisales), S side of Laguna de la Cocha.	2900-3100 m			Cuatrecasas,J.			11866		F	9-Jan	1941						1N 77.17W
Paepalanthus caryonauta		BOLIVIA	La Paz	Franz Tamayo. Parque Nacional Madidi, entre Queara y Mojos, cuesta de Calistía.	3600 m	Pajonales del paramo yungueño dominados por Festuca procera. En sitio encharcado.	Formando cojines pequeños.	Fuentes,A.	et al.		12018		MO	25 Feb	2008			14'41'26"S	68 59'44"W	Label	14.69S 69W
Paepalanthus pilosus var. pilosus		PERU	Cajamarca	Prov. Celendín. Jalca de Kumulca (Ruta a Celendin).	3300 m	Ladera rocosa. Jalca.	Small cushion plant.	Sagástegui,A.	et al.		12242		F,MO	18 Aug	1984						7.07S 78.25W
Paepalanthus pilosus var. pilosus		ECUADOR	Azuay	de Jima a San Miguel, Paramo de Matanga.	3340 m	Bosque nublado y turbera.		Aedo,C.	et al.		13036		MO	18 Jul	2006			03 13'42"S	78 57'14"W	Label	3.23S 78.95W
Paepalanthus caryonauta		BOLIVIA	La Paz	Bautista Saavedra. Area natural de Manejo Integrado Apolobamba, sector Codo, mas alla de Chaka, por el antiguo camino Laji Sorapata-Apolo.	3274 m	Bosques yungueños primarios y secundarios degradados por fuego en ceja de monte inferior pluvial. En filos.	Hierbita colonial en cojín; cabezuelas grises. Tejido en silicagel.	Fuentes,A.	H. Huaylla		13574		F,MO	28 Mar	2009			14 53'06"S	68 46'35"W	Label	14.89S 68.78W
Paepalanthus species A		COLOMBIA	César	La Paz, Corr. San Jose de Oriente, Vda. Altos del Riecito – Altos de Perijá, Fca. Los Sauces	3096 m			Rangel,J.O.			13692		COL [COL000254069]	27-Feb	2006			10˚14’48.75”N	72˚57’44.5”W	Label	10.25N 72.96W
Paepalanthus caryonauta		PERU	Cusco	Paso de Tres Cruces, Cerro de Cusilluyoc.	3800-3900 m	Open grassy paramo.	Perennial herb, forming mats.	Pennell,F.W.			13864		F	3 May	1925						13.12S 71.62W
Paepalanthus dendroides		PERU	Cusco	Paso de Tres Cruces, Cerro de Cusilluyoc.	3800-3900 m	Open grassy paramo.	Perennial herb forming mats.	Pennell,F.W.			13866		F	9 May	1925						13.12S 71.62W
Paepalanthus species A	aff. (small)	COLOMBIA	Santander	Paramo de Las Vegas. [Locality guessed from Killip's report 1927 & elevation]	3700-3800 m			Killip,E.P.	A.C.Smith		15626		F	20 to 21-Dec	1926						7.06N 72.88W
Paepalanthus dendroides		COLOMBIA	Santander	Vicinity of Las Vegas	2600-3000 m	Marshy meadow.		Killip,E.P.	A.C.Smith		16064		F	21 to 23-Dec	1926						7.03N 72.9W
Paepalanthus caryonauta		PERU	Pasco	Oxapampa. Distr. Huancabamba. Parque Nac Yanachaga-Chemillen, parte alta del campamento Abra-Yanachaga.	2940 m	Bosque esclerofilo mixto primario.		Monteagudo,A.	et al.		16143		F,MO,USM	2 Dec	2007	original det P. pilosus, Hensold 2011		10 22'49"S	75 27'42"W	Label	10.38S 75.46W
Paepalanthus pilosus var. pilosus		COLOMBIA	Cundinamarca	Cordillera Oriental vertiente Oriental, (Páramo) Valle del rio San Cristobal; Alto de la Horqueta.	3500-3575 m			Garcia-Barriga,H.			16158		UDBC (online)	16-Nov	1958	filed as P dendroides but seems normal 'pilosus' with fruiting capitula on long ped's & lvs spreading.					4.52N 74.04W
Paepalanthus pilosus var. pilosus		COLOMBIA	Cundinamarca	Guasca	3200 m	Wet bank, near cloud forest.	Plants glaucous	Gillett,J.M.			16589		MO	6-Mar	1974						4.84N 73.83W
Paepalanthus huancabambensis		PERU	Piura	Huancabamba. Jalca de Chiguelas.	3082 m	Pajonal.	Hierba arrosetada con capitulos blancos.	Sagástegui,A.	et al.		16799		F	19 Oct	2001		TYPE: Paepalanthus huancabambensis	5 8.2'S	79 23.6'W	Label	5.14S 79.39W
Paepalanthus pilosus var. pilosus		PERU	Piura	Huancabamba. Carmen de la Frontera. Alturas de Nueva York. UTM 0679179 - 9457896	3160 m	Ladera con suelos arcilloso y abundante materia organica. Bosque montano con domniancia de Podocarpus & Weinmannia.	Hierba en suelo pantanoso con Sphagnum. Escasa.	Cano,A.	et al.		16840		F,USM	28 Jul	2006						4.9S 79.38W
Paepalanthus caryonauta		COLOMBIA	Cauca	Cord. Central, W slope.Cabeceras del Rio Palo, altos paramos entre Quebr de San Paulino & Quebr del Lopez: Lagunilla de Las Casitas [don't know which branch of 'Rio Palo' [Rio Paila?] to follow, random guess]	3700 m			Cuatrecasas,J.			19099		F	3-Dec	1944						2.97N 76.14W
Paepalanthus species A	aff. (small)	COLOMBIA	Santander [?]	Paramo de Santurban, betw Tona & Mutiscua [this elevation probably is Norte de Santander?]	3800-4300 m		Heads dark gray.	Killip,E.P.	A.C.Smith		19557		F	18-Feb	1927						7.27N 72.8W
Paepalanthus caryonauta		COLOMBIA	Valle del Cauca	Cordillera Central, vertiente occidental; Cabecera del Rio Tulua, Quebrada de Las Vegas.	3280-3380 m	Montes.	Densisimo pulvinetum	Cuatrecasas,J.			20278		F	24-Mar	1946						3.92N 75.87W
Paepalanthus pilosus var. pilosus		VENEZUELA	Trujillo	Parque Nac Guaramacal. por el camino desde las antenas hacia las lagunas del Pumar	2900-3000 m	Paramo, entre alfombra de Sphagnum.	Hierba en cojín denso	Stergios,B.	et al.		20801		MO	14-Feb	2004						9.19N 70.22W
Paepalanthus pilosus var. pilosus		PERU	Amazonas	Luya. Distrito Camporedondo, Tullanya, Cerro Hiucsocunga.	3320 m	Vegetacion de jalca arbustos mayormente menores que 1.5 m de alto.		Vásquez-M.,R.	R.Rojas		21996		MO	9 Dec	1996			06 04'29"S	78 18'44"W	Label	6.07S 78.31W
Paepalanthus dendroides		PANAMA	Bocas del Toro	Between Itamut & Bine Peaks, Fabrega massif.	3200 m	In seepages.	Cushion plants. Dark ash grey florets.	Gómez,L.D.	et al.		22436		F,MO	5 to 9-Mar	1984						9.09N 82.89W
Paepalanthus dendroides		PANAMA	Bocas del Toro	Between Itamut & Bine Peaks, Fabrega massif.	3200 m	In seepages.	Cushion plant, heads white.	Gómez,L.D.	et al.		22439		F,MO	5 to 9-Mar	1984						9.09N 82.89W
Paepalanthus pilosus var. pilosus		PANAMA	Bocas del Toro	Between Itamut & Bine Peaks, Fabrega massif.	3200 m	In seepages.	Cushion plant. Heads grayish.	Gómez,L.D.	et al.		22440		F(2),MO	5 to 9-Mar	1984						9.09N 82.89W
Paepalanthus dendroides		PANAMA	Bocas del Toro	1-2 km SWW of Itamut camp.	3175 m	In seepages.	Cespitose. Heads ashy grey.	Gómez,L.D.	et al.		22591		F,MO	6 to 7-Mar	1984						9.09N 82.88W
Paepalanthus dendroides		COLOMBIA	Cauca	Cordillera Central, eastern slope near the border.	2980-3000 m	paramo.	Almohadillo. Hierba. Hoja verde claro.	Cuatrecasas,J.			23654		F,P	2-Feb	1947						2.87N 75.99W
Paepalanthus pilosus var. pilosus		COSTA RICA	Cartago	Cerro de la Muerte, Cordillera de Talamanca.	3100 m	In a bog.	Growing in dense mats.	Williams,L.O.	et al.		24472		F	6-Feb	1963						9.55N 83.75W
Paepalanthus species A		COLOMBIA	César	[Serranía de Perijá], east of Manaure, Sabana Rubia	3000-3100 m	Páramo		Cuatrecasas,J.	R.Romero-Castañeda		25025		COL [COL000223802], US n.v.	6 to 8-Nov	1959						10.31N 72.9W
Paepalanthus species A	cf.	COLOMBIA	César	Serrania de Perijá, E de Manaure, SAbana de Rubia	3000-3100 m			Cuatrecasas,J.	R.Romero-Castañeda		25027		COL nv, US (scan)	6-Nov	1959	seen only in photo					10.31N 72.9W
Paepalanthus species A	cf.	COLOMBIA	César	Serrania de Perijá, E de Manaure, Cerro Avion	3450-3550 m			Cuatrecasas,J.	R.Romero-Castañeda		25143		COL nv, US (scan)	8-Nov	1959	seen only in photo					10.11N 72.92W
Paepalanthus pilosus var. pilosus		PANAMA	Bocas del Toro	Cordillera Talamanca, Cerro Fabrega, main peak of the Cerro Fabrega massif	3100-3300 m	Paramo w/Chusquea-composite shrubs and tussock grasses dominant.	Cushion plant. Heads grayish.	Davidse,G.	et al.		25303		F,MO	6 & 8-Mar	1984			9 07'N	82 52'40"W	Tropicos	9.12N 82.88W
Paepalanthus pilosus var. pilosus		PANAMA	Bocas del Toro	Cordillera Talamanca, 4 km due NW of the main peak of Cerro Fabrega along the NW ridge of the massif.	3000-3150 m	Lowest paramo slopes wtih low-forested gullies.	Cushion plant. Flowers gray.	Davidse,G.	et al.		25419		F,MO	7-Mar	1984			9 09'N	82 54'W	Tropicos	9.15N 82.9W
Paepalanthus pilosus var. pilosus		COLOMBIA	Cundinamarca	Macizo de Bogota, La Calera, Paramo de Palacio, (Hacienda La Siberia)	3420-3500 m		Compact dense cushions	Cuatrecasas,J.	et al.		25574		F	8-Dec	1959						4.72N 73.89W
Paepalanthus dendroides		COLOMBIA	Boyacá	Valley of Rio Pomera, 14 km NW of Arcabuco	8000 feet (2440 m)	In saturated sphagnum over sand.	Large compact clumps mixed with saturated sphagnum overlaying sand, La Cumbre.	Fassett,N.C.			25629		MO	20-Aug	1944						5.83N 73.51W
Paepalanthus dendroides		COLOMBIA	Boyacá	Valley of Rio Pomera, 11 km NW of Arcabuco	2620 m	Wet roadside at foot of cliff in canyon		Fassett,N.C.			25633		MO	20-Aug	1944						5.81N 73.49W
Paepalanthus lodiculoides		COLOMBIA	Cundinamarca	Around the Laguna de Chisacá, Páramo de Chisacá, Macizo de Bogota.	3650-3700 m		Dense soft thick cushions.	Cuatrecasas,J.	R.Jaramillo M.		25737		LL	29-Dec	1959		TYPE: Paepalanthus polytrichoides var. densus				4.28N 74.2W
Paepalanthus dendroides		COSTA RICA	Limón/Puntarenas	Cordillera de Talamanca, Cerro Kasir, on the continental divide.	2950 m	In marsh of paramo.	Flowers greyish-white.	Davidse,G.	et al.		25871		F, MO	22-Mar	1984			9 12'N	83 03'30"W	Label	9.2N 83.06W
Paepalanthus pilosus var. pilosus		COLOMBIA	Cundinamarca	Paramo de Chisaca, Laguna Negra	3660-3720 m		Rosettes in cushions, leaves light green, flowers white.	Cuatrecasas,J.	R.Jaramillo M.		25882		F	11-Sep	1961						4.33N 74.19W
Paepalanthus dendroides		COSTA RICA	Limón	Cordillera de Talamanca, Cerro Kamuk massif, betw Cerro Dudu and Cerro Apri.	2900-3100 m	In open patches among shrubs. Shrub paramo dominated by Diplostephium, Blechnum and other shrubs 1.5-2m tall.	Cushion plants; flowers greyish-white.	Davidse,G.	et al.		25928		F,MO	23 & 26-Mar	1984			9 14'30"-15'30"N	83 03'30"-04'30"W	Label	9.24N 83.06W
Paepalanthus dendroides		COLOMBIA	Santander	Paramo N of Cerrito	10500 feet (3200 m)	Saturated soil.	Dense at 30 cm diamter.	Fassett,N.C.			25929		MO	12-Oct	1944						6.86N 72.7W
Paepalanthus lodiculoides		COLOMBIA	Cundinamarca	Macizo de Bogotá: Páramo de Chisacá, open hill at left side of road.	3680-3700 m		Cushion plant. Flowers white.	Cuatrecasas,J.	R. Jaramillo M.		25987		F	16-Sep	1961						4.28N 74.2W
Paepalanthus pilosus var. pilosus		COSTA RICA	Cartago	Cerro Asunción, ca. 38 km SE of El Empalme or 30 km NNW of San Isidro del General.	3350 m	Chusquea thickets.	Dense cushion-former.	Wilbur,R.L.			26123		F	19-Mar	1978						9.57N 83.75W
Paepalanthus pilosus var. pilosus		VENEZUELA	Merida	Paramo de Muchuchies	3750 m			Humbert,H.			26300		F	Sept	1952						8.77N 70.93W
Paepalanthus pilosus var. pilosus		COLOMBIA	Cundinamarca	Mpio. de La Calera, Paramo de la Siberia	3000-3500 m			Humbert,H.	et al.		26894		P (P01762697)	25-Oct	1952						4.72N 73.89W
Paepalanthus lodiculoides		COLOMBIA	Cundinamarca	Macizo de Sumapaz, lado norte: Andabobos.	3720-3760 m	Paramo.		Cuatrecasas,J.	J.M.Idrobo		27054		F	8-Jan	1969						4.06N 74.3W
Paepalanthus dendroides		COSTA RICA	Limón	Cordillera de Talamanca, Atlantic slope, unnamed cordillera between teh Rio Terbi and Rio Siní.	2400-2750 m	Elfin forest edge. Blechnum paramo opening in forest. Marshy soil.	Heads white.	Davidse,G.	et al.		28991		F,MO	13-Sep	1984			9 00'-9 12'N	82 58'-82 59'W	Label	9.18N 82.97W
Paepalanthus dendroides		PERU	Pasco	Oxapampa. Dist. Huancabamba. Localidad de Santa Barbara.	3400-3500 m	Bosque montano muy humedo, pradera expuesta con humedales y manchas de arboles hasta 12 m de alto.	Formando almohadillas en las humedades.	Vásquez-M.,R.	et al.		29038		F,MO,USM	25 Jan	2004			10 20'35"S	75 39'00"W	Label	10.34S 75.65W
Paepalanthus dendroides		COSTA RICA	Limón/Puntarenas	Cordillera de Talamanca, Cerro Kasir, on the continental divide.	2950 m	Oak-Podocarpus forest with Chusquea understory.	Heads greyish-white, cushion plant.	Davidse,G.	G.Herrera Ch.		29339		F,MO	20-Sep	1984			9 12'N	83 03'W	Label	9.2N 83.05W
Paepalanthus pilosus var. pilosus		COLOMBIA	Cundinamarca	Paramo de Guasca	3300-3500 m	In moist sphagnum	(lax plant growing in Sphagnum)	Killip,E.P.			34090		F	12-Mar	1939						4.81N 73.82W
Paepalanthus pilosus var. pilosus		COSTA RICA	San José	Cerro de las Vueltas	2700-3000 m	In paramo.	Forming dense broad cushions. Common.	Standley,P.	J.Valerio		43637		F	29 dec 1925 to 1-Jan	1925						9.62N 83.85W
Paepalanthus pilosus var. pilosus		COSTA RICA	San José [?]	Cerro de las Vueltas	3000 m			Standley,P.	J.Valerio		43830		F	26 Dec 1925 to 3 Jan 1926	1925						9.62N 83.85W
Paepalanthus pilosus var. pilosus		ECUADOR	Morona-Santiago	Between Pailas & El Pan.	3445 m	Moist places in paramo.	In dense tufts.	Steyermark,J.			54342		F	10 Sept	1943		TYPE: Paepalanthus espinosianus				2.82S 78.58W
Paepalanthus pilosus var. pilosus		ECUADOR	Loja	Betw Tambo Cachiyacu, La Entrada, and Nudo de Sabanillas.	2500-3500 m	Growing in dense mats on moist banks		Steyermark,J.			54452		F	07 Oct	1943		TYPE: Paepalanthus loxensis				4.47S 79.16W
Paepalanthus pilosus var. pilosus		VENEZUELA	Lara	Between Buenos Aires and Páramo de las Rosas.	3050 m	Dry paramo at 10,000 feet	N.V. 'flor de tierra'	Steyermark,J.			55495		F	11-Feb	1944		TYPE: Paepalanthus subsessilis				9.59N 70.12W
Paepalanthus pilosus var. pilosus		VENEZUELA	Merida	Between Timotes and Paramito [Alto El Paramito on google maps]	2285-3500 m	Dry rocky gneissic, granitic slopes. In dense mats on damp clay banks.	In hemispherical clumps, in dense mats on damp clay banks in paramo.	Steyermark,J.			55727		F	24-Mar	1944						9.04N 70.81W
Paepalanthus lodiculoides		VENEZUELA	Táchira	Páramo de Tamá, near Colombian-Venezuelan boundary	3045-3475 m	Limestone outcrops in páramo.		Steyermark,J.			57372		F	15-Jul	1944		TYPE: Syngonanthus steyermarkii				7.42N 72.36W
Paepalanthus pilosus var. pilosus		VENEZUELA	Tachira	limestone outcrops [?] of Paramo de Tama, near Colomb-Venez border	3045-3475 m	Limestone outcrops?	In dense small tufts on flat rock.	Steyermark,J.			57377		F	15-Jul	1944						7.42N 72.37W
Paepalanthus pilosus var. pilosus		COSTA RICA	Cartago	Cerro de la Muerte, Cordillera de Talamanca.	3470 m	Paramo.		Godfrey,R.K.			66733		MO	26-Feb	1965			9 33'N	83 45'W	Tropicos	9.55N 83.75W
Paepalanthus pilosus var. pilosus		VENEZUELA	Merida	Teleferico trail at Estacion La Aguada, between Merida & Pico Espejo	3475 m		forming large mats, leaves dark green	Steyermark,J.	T.Koyama		102359		F,MO	17-Dec	1969						8.55N 71.1W
Paepalanthus dendroides		PERU	Cusco	Prov. Paucartambo. P.N. Manu.		Pajonal no quemado. Entre manojo de gramineas altas.	Hierba arrosetada.	León,B.	N.Huapalla	USM	111244	[coll # illeg on foto]	USM (photo)	2 Sept	1990	det from photo
Paepalanthus pilosus var. pilosus	cf., or P. pilosus X P. dendroides?	COLOMBIA	Cundinamarca	Guasca, Guajira: Vereda Concepcion	2900-3000 m	Bosque altoandino. Ocupa espacio con musgo. Presencia de agua superficial.	Rosette, lvs small green, 1 cm diam.	Pinzón S., C.E.	Lopez-P.	CP-	701104		UDBC (online)	15-Nov	200'	filed as P dendroides as UDBC; peduncles very long. plants unusual.Infl seemingly not fertile. Cf. Schultes 81		04 45'50"	73 50'30"	Label	4.77N 73.78W
Paepalanthus dendroides		PERU	Huanuco	in the montana of Pillao and Chacahuasi' - fide H.Ruiz, 1940, collection site of 'E. parvum'				Ruíz & Pavón		MO acc no.	1612102	s.n.	MO ex BM	Aug to Sept	1787	distr'd as Eriocaulon parvum Koern.	Eriocaulon parvum R & P, nom nud.				9.67S 75.97W
Paepalanthus dendroides		COLOMBIA	Cundinamarca	inter Suba et Suacha.	1340 hex [=2600 m]			Humboldt & Bonpland				s.n.	B	Jul	1801		TYPE: Paepalanthus dendroides
Paepalanthus karstenii		COLOMBIA	Cundinamarca	Paramo de Chipaque				Karsten,H.				s.n.	W(F neg),B,LL				Type: Paepalanthus karstenii				4.46N 74.08W
Paepalanthus lodiculoides		PERU	Piura	Huancabamba. Talanco.	3500 m			Friedberg,C.				s.n.	USM (photo)			det from photo					5.08S 79.54W
Paepalanthus pilosus var. pilosus		COLOMBIA	Cundinamarca	inter Suba et Suacha.	1340 hex [=2600 m]			Humboldt & Bonpland				s.n.	B	Jul	1801		TYPE: Paepalanthus pilosus
